# Supplementary material for: Re-evaluation of the lifetimes of the major CFCs and CH 3 CCl 3 using atmospheric trends
Source: Copernicus journal article supplement (doi:10.5194/acp-13-2691-2013), 2013-03-06
Supplement: Supplementary file 1 [file acp-13-2691-2013-supplement.zip]

# RE-EVALUATION OF THE LIFETIMES OF THE MAJOR CFCs AND $\text{CH}_3\text{CCl}_3$ USING ATMOSPHERIC TRENDS

## LIFETIMES OF HCFCs AND HFCs

M. RIGBY ET AL.

Following the phase-out of chlorofluorocarbons (CFCs), there has been a rapid growth in the use of hydrochlorofluorocarbons (HCFCs) and hydrofluorocarbons (HFCs) in applications that CFCs were used for (e.g. refrigeration). These compounds are less destructive to stratospheric ozone than CFCs because of their lower (or zero) chlorine content and because they are largely destroyed in the troposphere. Their tropospheric destruction occurs primarily through reaction with the hydroxyl radical (OH).

In this section, we have used the OH fields that were generated in our inversion using AGAGE observations to estimate the resulting steady-state lifetime of the most abundant of these compounds. Stratospheric lifetimes for each species were based on the estimates of Naik et al. (2000) and reaction rates with OH were taken from Sander et al. (2011). No oceanic sinks were assumed. Steady-state lifetimes were estimated using the methodology outlined in the main text. Approximate uncertainties are derived from the uncertainty in the OH field, although uncertainties due to stratospheric losses and reaction rates with OH are neglected. Estimates of the OH uncertainty include the measurement and modeling uncertainties derived in the inversion, and an estimate of the uncertainty due to the assumed  $\text{CH}_3\text{CCl}_3$  stratospheric and oceanic lifetimes (which we assumed to be accurate to approximately 30% and 37% based on Park et al. (1999) and Butler et al. (1991) respectively). Lifetimes of  $\text{CH}_3\text{CCl}_3$  and  $\text{CH}_4$  are included for reference. A 120 year stratospheric lifetime was assumed for  $\text{CH}_4$ . Also shown are the partial steady-state lifetimes with respect to OH losses.

TABLE 1. Global steady state lifetimes and lifetimes with respect to OH loss for the major HCFCs, HFCs,  $\text{CH}_3\text{CCl}_3$  and  $\text{CH}_3$ .

| Gas                       | Steady-state<br>global lifetime<br>(years) | Steady-state<br>lifetime w.r.t.<br>OH loss (years) | 1-sigma<br>uncertainty due<br>to OH field<br>(approx, years) |
|---------------------------|--------------------------------------------|----------------------------------------------------|--------------------------------------------------------------|
| $\text{CH}_3\text{CCl}_3$ | 5.04                                       | 6.16                                               | 0.18                                                         |
| $\text{CH}_4$             | 9.7                                        | 10.6                                               | 0.4                                                          |
| HCFC-22                   | 12.2                                       | 13.09                                              | 0.5                                                          |
| HCFC-141b                 | 9.18                                       | 10.76                                              | 0.4                                                          |
| HCFC-142b                 | 17.36                                      | 19.53                                              | 0.8                                                          |
| HFC-23                    | 251.12                                     | 281.75                                             | 10                                                           |
| HFC-32                    | 5.34                                       | 5.7                                                | 0.23                                                         |
| HFC-125                   | 28.82                                      | 32.74                                              | 1.2                                                          |
| HFC-134a                  | 13.7                                       | 14.58                                              | 0.6                                                          |
| HFC-143a                  | 47.36                                      | 55.43                                              | 2.3                                                          |
| HFC-152a                  | 1.57                                       | 1.64                                               | 0.07                                                         |
| HFC-227ea                 | 36.32                                      | 38.54                                              | 1.6                                                          |
| HFC-245fa                 | 7.99                                       | 8.47                                               | 0.34                                                         |

## REFERENCES

- J. H. Butler, J. W. Elkins, T. M. Thompson, B. D. Hall, T. H. Swanson, and V. Koropalov. Oceanic Consumption of CH<sub>3</sub>CCl<sub>3</sub>: Implications for Tropospheric OH. *Journal of Geophysical Research*, 96(D12):22347–22355, 1991.
- V. Naik, A. K. Jain, K. O. Patten, and D. J. Wuebbles. Consistent sets of atmospheric lifetimes and radiative forcings on climate for CFC replacements: HCFCs and HFCs. *Journal of Geophysical Research*, 105(D5):6903–6914, 2000.
- J. H. Park, M. K. W. Ko, C. H. Jackman, R. A. Plumb, J. A. Kaye, and K. H. Sage, editors. *Models and Measurements Intercomparison II*. National Aeronautics and Space Administration, Hampton, Virginia, 1999.
- S. P. Sander, J. Abbatt, J. R. Barker, J. B. Burkholder, R. R. Friedl, D. M. Golden, R. E. Huie, C. E. Kolb, M. J. Kurylo, G. K. Moortgat, V. L. Orkin and P. H. Wine “Chemical Kinetics and Photochemical Data for Use in Atmospheric Studies, Evaluation No. 17,” JPL Publication 10-6, Jet Propulsion Laboratory, Pasadena, 2011 <http://jpldataeval.jpl.nasa.gov>
