# Supplementary material for: Re-evaluation of the lifetimes of the major CFCs and CH 3 CCl 3 using atmospheric trends
Source: Copernicus journal article supplement (doi:10.5194/acp-13-2691-2013), 2013-03-06
Supplement: Supplementary file 2 [file acp-13-2691-2013-supplement.zip]

# RE-EVALUATION OF THE LIFETIMES OF THE MAJOR CFCS AND $\text{CH}_3\text{CCL}_3$ USING ATMOSPHERIC TRENDS

## MODEL-MEASUREMENT INTER-COMPARISON

M. RIGBY ET AL.

Here we compare model-generated ‘optimized’ mole fractions with AGAGE and NOAA measurements. Figure 1 shows the residual between the optimized model and AGAGE mole fractions, and Figure 2 shows the comparison for NOAA measurements. The figures show no significant trend in the residuals.

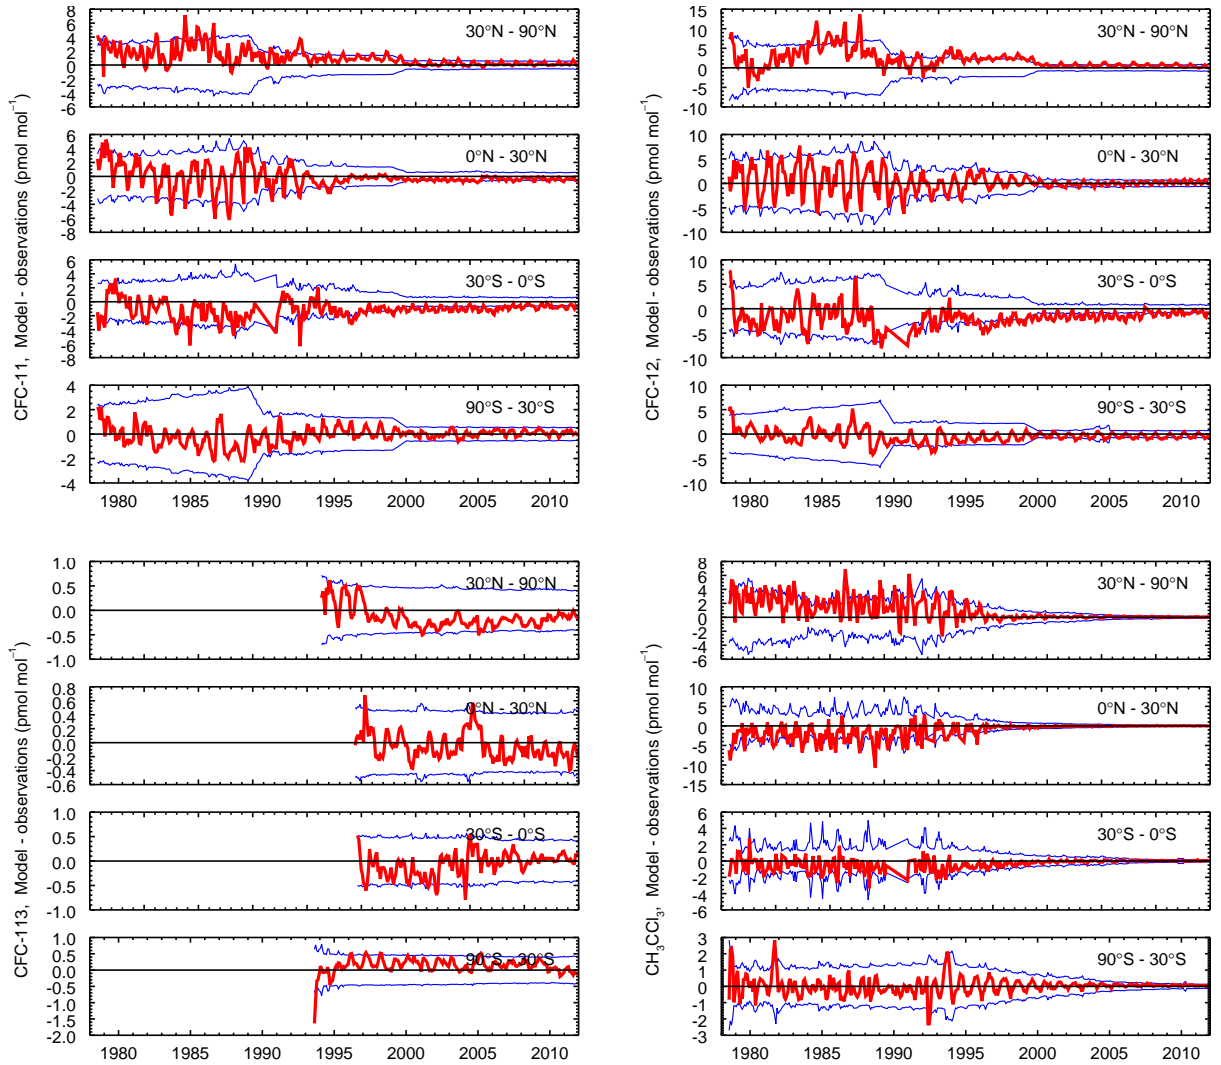

FIGURE 1. Inter-comparison of AGAGE observations and optimized model mole fractions. The red line shows the residual between the optimized and measured mole fractions in each semi-hemisphere. The blue lines show the 1-sigma measurement errors.

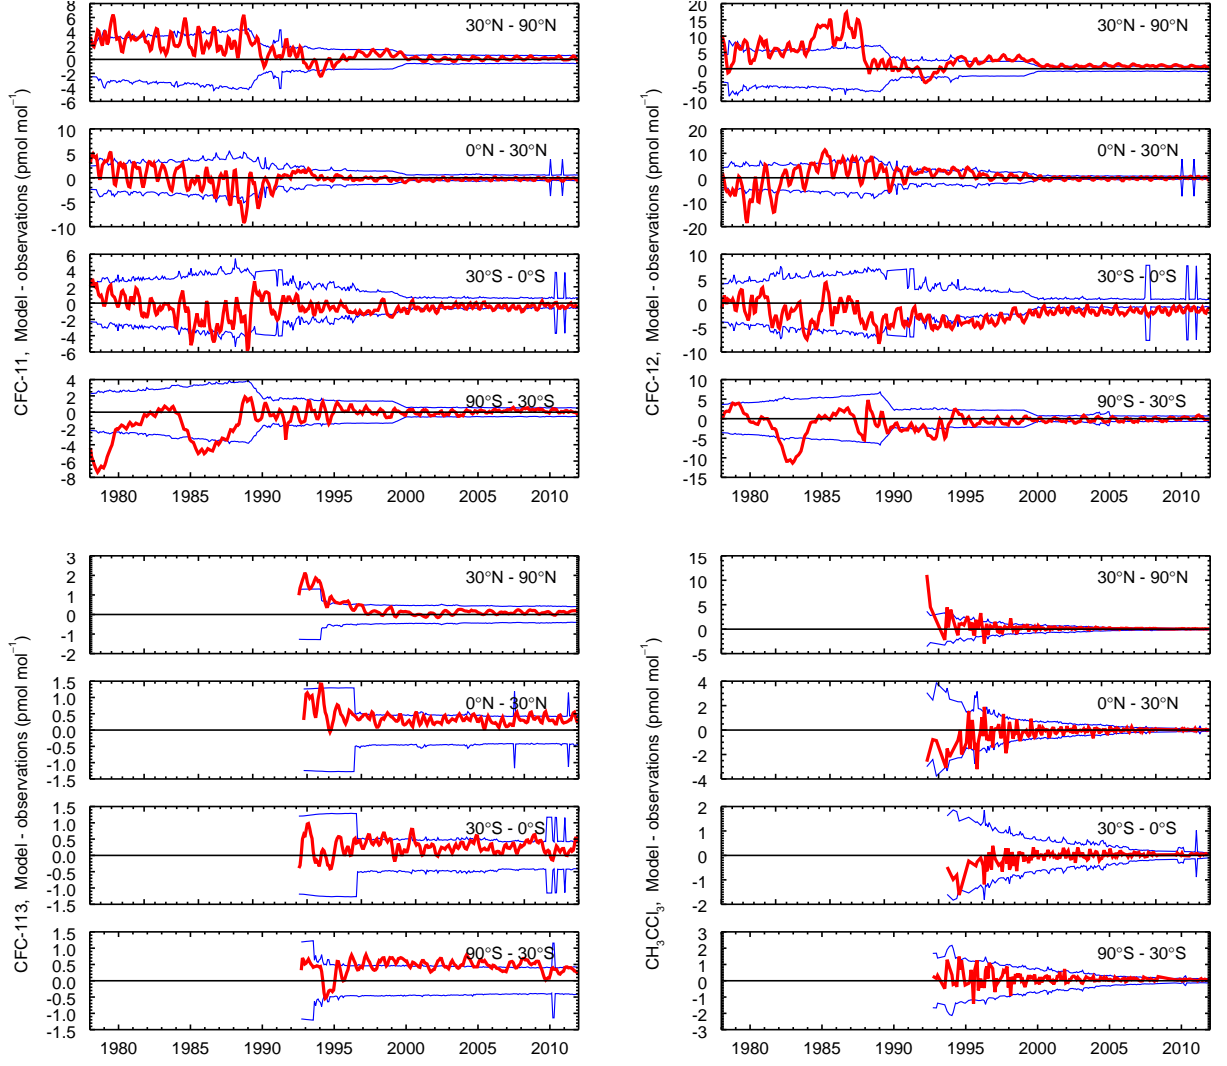

FIGURE 2. Inter-comparison of NOAA observations and optimized model mole fractions. The red line shows the residual between the optimized and measured mole fractions in each semi-hemisphere. The blue lines show the 1-sigma measurement errors.
